# Supplementary material for: Identification of shared genetic loci for asthma, allergic rhinitis, and pollinosis in East Asians
Source: Research Square preprint supplement (doi:10.21203/rs.3.rs-5242975/v1), 2024-12-05
Supplement: Supplementary file 1 [file 1e7de5bd30889058c192d292.docx]

**Table S1.** Details on the characteristics of GWAS datasets of asthma, allergic rhinitis, and pollinosis.

| **Phenotype** | **Data source** | **Population** | **Total sample size** | **Ncase** | **Ncontrol** | **Source ID or Source link** |
| --- | --- | --- | --- | --- | --- | --- |
| Asthma | GWAS Catalog | East Asian | 175,948 | 13,015 | 162,933 | GCST90018575 |
| Allergic_rhinitis | GWAS Catalog | East Asian | 161,563 | 7,897 | 153,666 | GCST90018572 |
| Pollinosis | GWAS Catalog | East Asian | 172,259 | 18,593 | 153,666 | GCST90018683 |

**Table S2.** SNP based heritability estimated by LDSC.

| **Phenotype** | **h2** | **SE** |
| --- | --- | --- |
| Asthma | 0.0301 | 0.0041 |
| Allergic_rhinitis | 0.0114 | 0.0029 |
| Pollinosis | 0.0218 | 0.0031 |

h2 (heritability): the proportion of phenotypic variation explained by genetic variants

**Table S3.** Significant local genetic correlation regions among asthma, allergic rhinitis, and pollinosis.

| **Phenotype1** | **Phenotype2** | **CHR** | **Start** | **End** | **local_rhog** | **SE** | ***P*** |
| --- | --- | --- | --- | --- | --- | --- | --- |
| Asthma | Allergic_rhinitis | 2 | 241149921 | 244188920 | 0.00089796 | 0.00015077 | 2.59E-09 |
| 6 | 31571218 | 32682664 | 0.0022106 | 0.00031515 | 2.31E-12 |
| 10 | 8774665 | 10249396 | 0.00073684 | 0.00016702 | 1.03E-05 |
| 12 | 110336719 | 113263518 | 0.0016187 | 0.00017033 | 2.03E-21 |
| Asthma | Pollinosis | 10 | 8774665 | 10249396 | 0.00091518 | 0.00016801 | 5.12E-08 |
| 17 | 39899810 | 41772087 | 0.00053155 | 0.00012652 | 2.66E-05 |
| Pollinosis | Allergic_rhinitis | 3 | 49316972 | 51832015 | 0.00064473 | 0.00013437 | 1.60E-06 |
| 6 | 31571218 | 32682664 | 0.0013731 | 0.00018815 | 2.92E-13 |

**local_rhog:** local genetic correlation between pairs of traits within each of the 1703 pre- specified LD-independent segments.

Statistical significance using Bonferroni correction to account for multiple testing, setting threshold at *P* < 0.05/1703.

**Figure S1.** Heat maps showing patterns of cell-type-specific enrichments of SNP-heritability for genetically associated traits across 396 cell-type-specific annotations. Each checkered rectangle reflects the z-score, scaled by traits. Red indicates enrichment, blue indicates depletion. Deeper color represents stronger magnitude of effects. Asterisks represent statistical significance withstanding multiple correction. The category of cell-types is color coded to the left. A) DNase (DNase I hypersensitive sites), B) H3K27ac, C) H3K36me3, D) H3K4me1, E) H3K4me3, and F) H3K9ac.

A) DNase

B) H3K27ac

C) H3K36me3

D) H3K4me1

E) H3K4me3

F) H3K9ac

**Figure S2.** Local genetic correlation among asthma, allergic rhinitis and pollinosis in East Asians. (A) Manhattan plot showing the estimates of local genetic correlation, genetic covariance, and SNP heritability between asthma and allergic rhinitis in East Asians. (B) Manhattan plot showing the estimates of local genetic correlation, genetic covariance, and SNP heritability between among asthma and pollinosis in East Asians. (C) Manhattan plot showing the estimates of local genetic correlation, genetic covariance, and SNP heritability between allergic rhinitis and pollinosis in East Asians. Red bars represent loci showing significant local genetic correlation after multiple testing adjustment (p < 0.05/1,703). AS, asthma; AR, allergic rhinitis; PO, pollinosis.

**Figure S3. Regional plots for the associations results at 9q32 from asthma GWAS of Europeans.** This figure presents regional plots for association results at the 9q32 locus from asthma GWAS of Europeans. Panel A shows the results for the index SNP rs57656777 identified as the most significant in MTAG analysis of Asians (purple diamond). Panel B displays the most significant SNP, rs2067583, identified in Europeans. In both panels, the -log10(p-values) of SNPs are plotted against their positions on chromosome 9, with the recombination rate indicated in cM/Mb. The SNPs are color-coded based on their linkage disequilibrium (r2) with the index SNP.

**Figure S4. Regional plots for the associations results at 10q25.2 from allergic rhinitis GWAS of Europeans.**
